# Supplementary material
Source: PubMed Central journal article supplement (PMC5551553)
Supplement: en.2017-00349.sf1.pdf [file en.2017-00349.sf1.pdf]

### **Supplemental Figure 1 Uterine deletion of ER $\alpha$**

ER $\alpha$  immunohistochemistry of representative sections from *Esr1<sup>ff</sup>* and *Esr1<sup>ff</sup>;Pgr<sup>Cre+</sup>*(ER $\alpha$ UtcKO) uterine tissue. White bar=60  $\mu$ M

### **Supplemental Figure 2 Hierarchical Cluster**

Cluster comparing all DE genes from WT, ER $\alpha$ UtcKO and Ex3 $\alpha$ ERKO samples treated with V, E2 or IGF1 for 2 hours or 24 hours. Yellow boxes indicate E2 selective DE genes.

### **Supplemental Figure 3 Pathway analysis of ER $\alpha$ -independent and dependent transcripts**

- A) Pathway analysis of ER $\alpha$  independent transcripts. Biological functions (left) and upstream regulators (right) significantly enriched in the transcripts selected in 3A. Visualizations show activation Z scores. Blue=predicted inhibition; orange=predicted activation
- B) Pathway analysis of ER $\alpha$  dependent transcripts. Biological functions (left) and upstream regulators (right) significantly enriched in the transcripts selected in 4A. Visualizations show the activation Z scores. Blue=predicted inhibition; orange=predicted activation

### **Supplemental Figure 4 Examples of ER $\alpha$ ChIP-seq and RNA-seq of ER $\alpha$ -independent and dependent genes**

- A. UCSC Genome Browser visualization of four ER $\alpha$  dependent genes (*Dhcr24*, *Wnt4*, *Ngfr* and *Map2k6*). Each panel includes four ER $\alpha$  ChIP-seq tracks (Vehicle (V), 1h E2, 1h IGF1 and 1h ICI) below the Refseq transcript track. Below are RNA-seq tracks from saline vehicle (V) or E2 2h samples. Boxes indicate peaks of E2 or IGF1 dependent ER $\alpha$  binding. Dashed arrows indicate transcription direction.

- B. Venn diagram comparing the 1724 TSS closest to overlapping E2 and IGF1 ER $\alpha$  ChIP-peaks and the 262 coding RNA transcripts from the 654 transcripts selected in Fig. 3A. Genes listed did not overlap with E2 and IGF1 ER $\alpha$  binding sites and were tested by RT-PCR.
- C. UCSC Genome Browser visualization of three ER $\alpha$  independent genes (*Fos*, *Adamts5*, and *Ppargc1a*). Each panel includes four ER $\alpha$  ChIP-seq tracks (Vehicle (V), 1h E2, 1h IGF1 and 1h ICI) below the Refseq transcript track. Below are RNA-seq tracks from vehicle (V) or E2 2h samples. For *Fos*, potential ER $\alpha$ -independent sites are indicated, where E2, but not IGF1 increases ER $\alpha$  binding.

Supplemental Table 1: RNA samples used in microarray study

| <b>Samples tested</b>          | <b>WT</b>    | <b>Ex3<math>\alpha</math>ERKO<br/>(global ER<math>\alpha</math>-null)</b> | <b>ER<math>\alpha</math>UtcKO (uterine<br/>ER<math>\alpha</math>-null)</b> |
|--------------------------------|--------------|---------------------------------------------------------------------------|----------------------------------------------------------------------------|
| <b>V (Saline)</b>              | <b>n=8</b>   | <b>n=2</b>                                                                | <b>n=3</b>                                                                 |
| <b>E<sub>2</sub> (2h, 24h)</b> | <b>n=9,9</b> | <b>n=2,2</b>                                                              | <b>n=3,3</b>                                                               |
| <b>IGF1 (2h, 24h)</b>          | <b>n=7,9</b> | <b>n=2,3</b>                                                              | <b>n=3,3</b>                                                               |

Table S2 Sequences of RT-PCR primers

| <b>Gene</b>     | <b>Forward Primer</b>    | <b>Reverse Primer</b>     |
|-----------------|--------------------------|---------------------------|
| <i>Adamts5</i>  | GTGGGAAGGGAAGAGTCTGC     | ACCCCAATTTCCATGGCTT       |
| <i>Cdkn1a</i>   | CAGCGACCATGTCCAATCC      | CGAAGAGACAACGGCACACTT     |
| <i>Dhcr24</i>   | GACACCAAGAAACAGATTGTTCGA | TGGAGTTCAGCAAAGCTGTCA     |
| <i>Fos</i>      | GGAATGGTGAAGACCGTGTC     | CCTCTTCAGGAGATAGCTGCTCTAC |
| <i>Map2k6</i>   | GCTCCCAGCAGACAAGTTCT     | TCTGGATATGTGGGCCGTTT      |
| <i>Ngfr</i>     | CGCTGACAACCTCATTCT       | GCAGCTGTTCCATCTCTTGA      |
| <i>Nr4a1</i>    | GGGCATGGTGAAGGAAGTTGT    | GAGGCTGCTTGGGTTTTGAA      |
| <i>Ppargc1a</i> | AAGGTCCCCAGGCAGTAGAT     | AAGGGAGAATTGCGGTGTGT      |
| <i>Sox4</i>     | GGCCCATGAACGCCTTT        | TCGGGCGACTGCTCCAT         |
| <i>Txnip</i>    | ACCACTTTCTCGGATGTTGGA    | GGAAAGACAACGCCAGAAGGT     |
| <i>Wnt4</i>     | AGTGACAAGGGCATGCAGC      | CATCCTGACCACTGGAAGCC      |

# Supplemental Figure 1

*Esr1*<sup>f/f</sup>

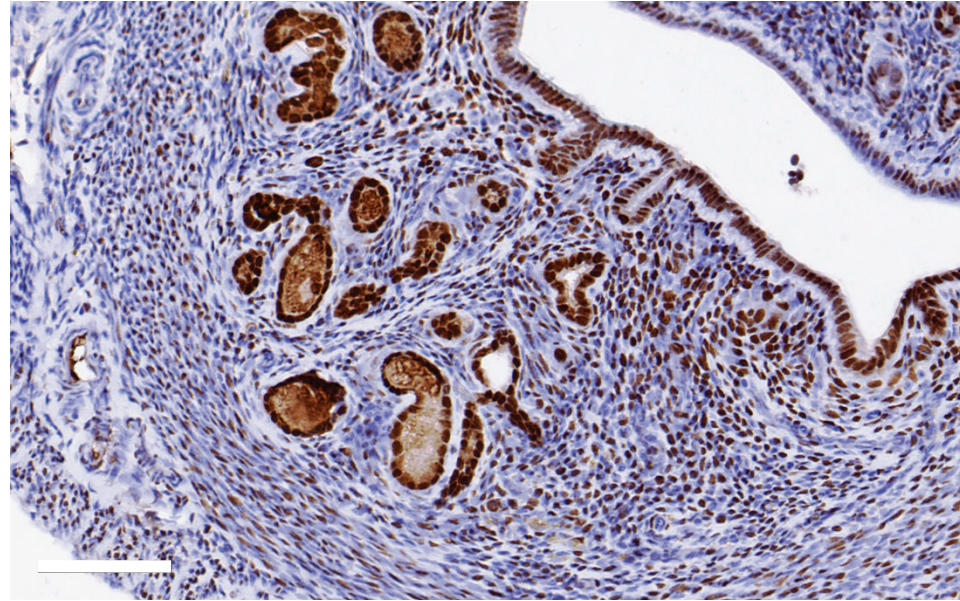

ER $\alpha$ UtcKO  
(*Pgr*<sup>Cre+</sup>; *Esr1*<sup>f/f</sup>)

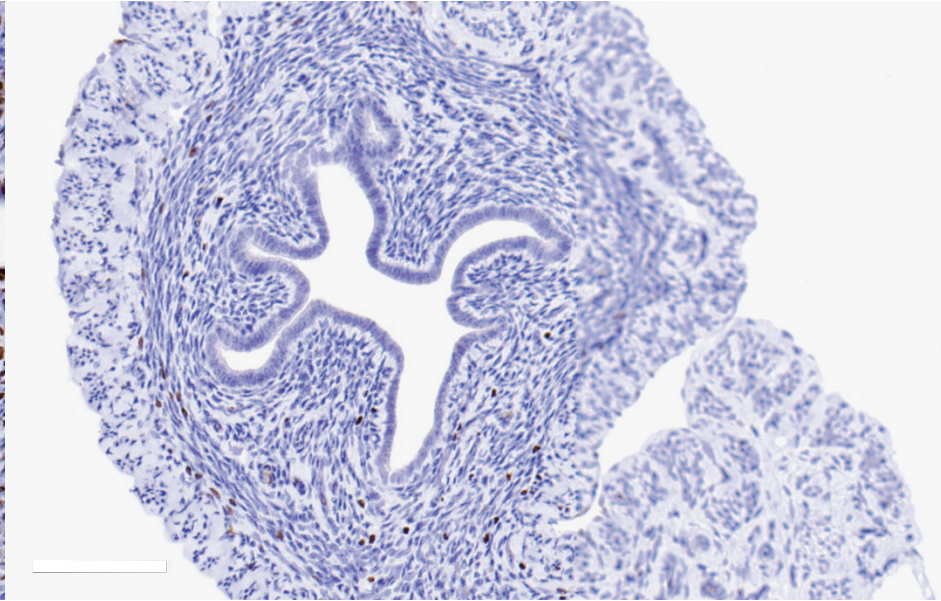

# Supplemental Figure S2

12000 DE probes log2 Intensities

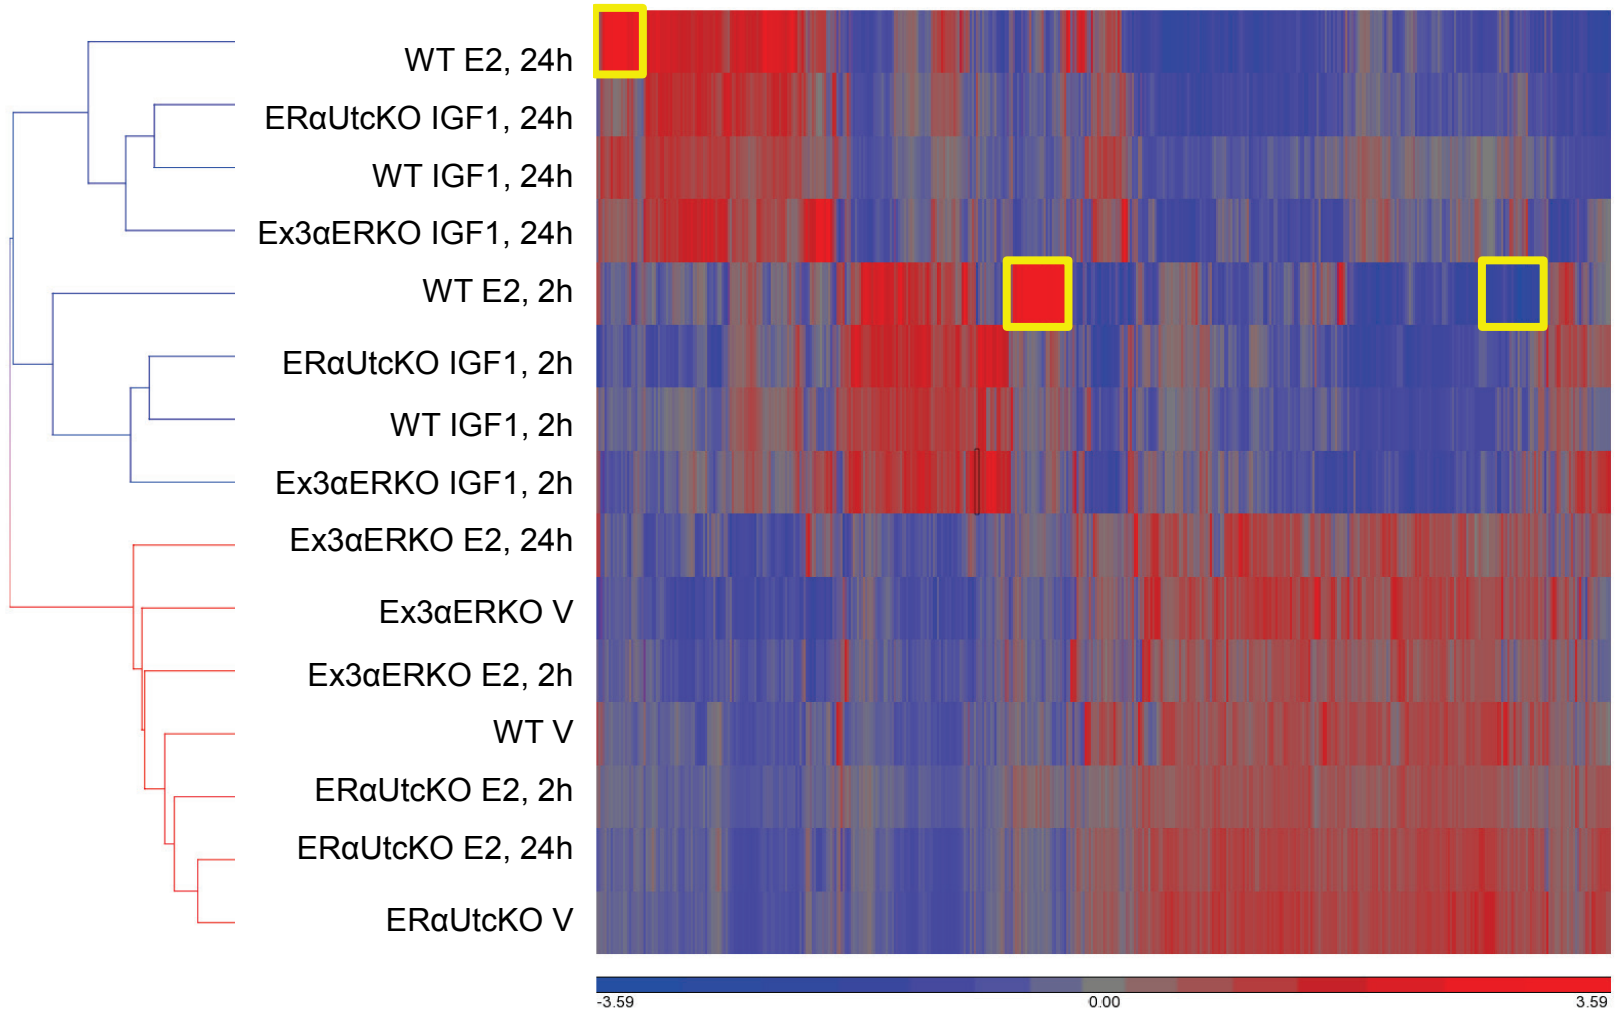

# Supplemental Figure 3A

## ER Independent

Diseases and Bio Functions

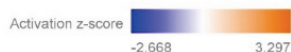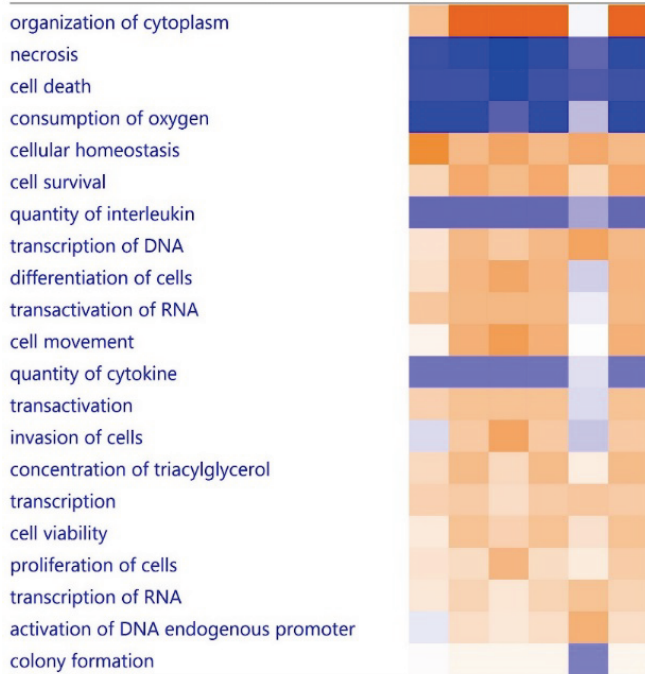

© 2000-2016 QIAGEN. All rights reserved.

## ER Independent

Upstream regulators

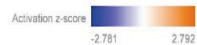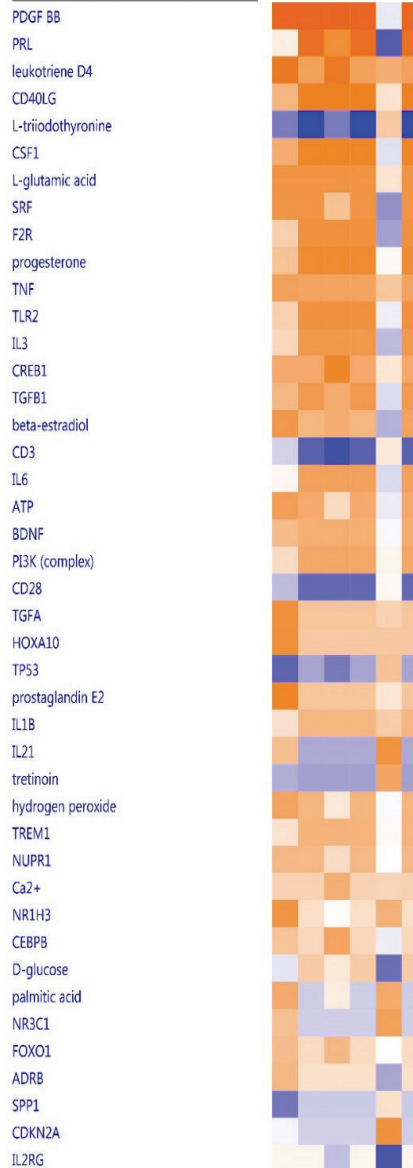

# Supplemental Figure 3B

## ER dependent/involved

Diseases and Bio Functions

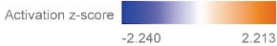

- proliferation of cells
- activation of cells
- synthesis of steroid
- secretion of molecule
- migration of cells
- cell death
- fatty acid metabolism
- biosynthesis of hydrogen peroxide
- transport of lipid
- synthesis of lipid
- transport of molecule
- export of lipid
- secretion of lipid
- conversion of lipid
- necrosis
- cell survival
- cell cycle progression
- concentration of lipid
- cell viability
- quantity of steroid
- ion homeostasis of cells

WT E2 2h/V  
 WT IGF1 2h/V  
 ERα UtcKO E2 2h/V  
 ERα UtcKO IGF1 2h/V  
 Ex3αERKO E2 2h/V  
 Ex3αERKO IGF1 2h/V

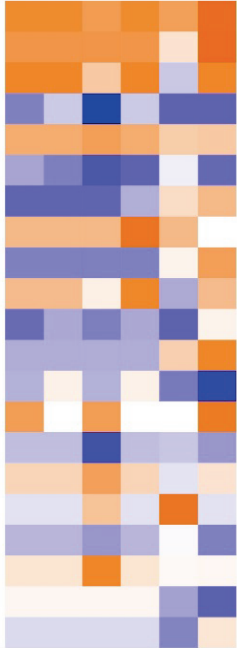

© 2000-2016 QIAGEN. All rights reserved.

## ER dependent/involved

Upstream regulators

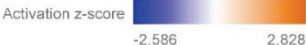

- CD28
- TP73
- LIF
- tretinoin
- HNF1A
- SOX2
- FGF2
- PPARG
- IL1
- IFNG
- L-triiodothyronine
- TGFB1
- beta-estradiol
- IL1B
- MYC
- KLF4
- OSM
- AR
- TP63
- TP53
- TNF

WT E2 2h/V  
 WT IGF1 2h/V  
 ERα UtcKO E2 2h/V  
 ERα UtcKO IGF1 2h/V  
 Ex3αERKO E2 2h/V  
 Ex3αERKO IGF1 2h/V

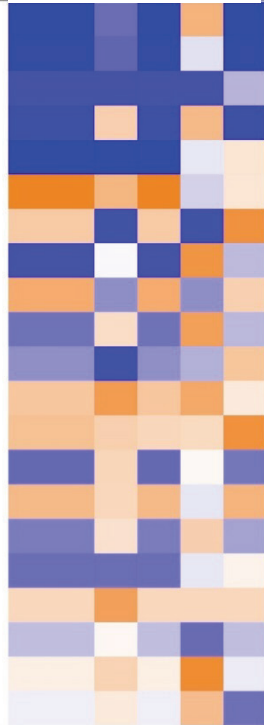

© 2000-2017 QIAGEN. All rights reserved.



# Supplemental Figure 4A

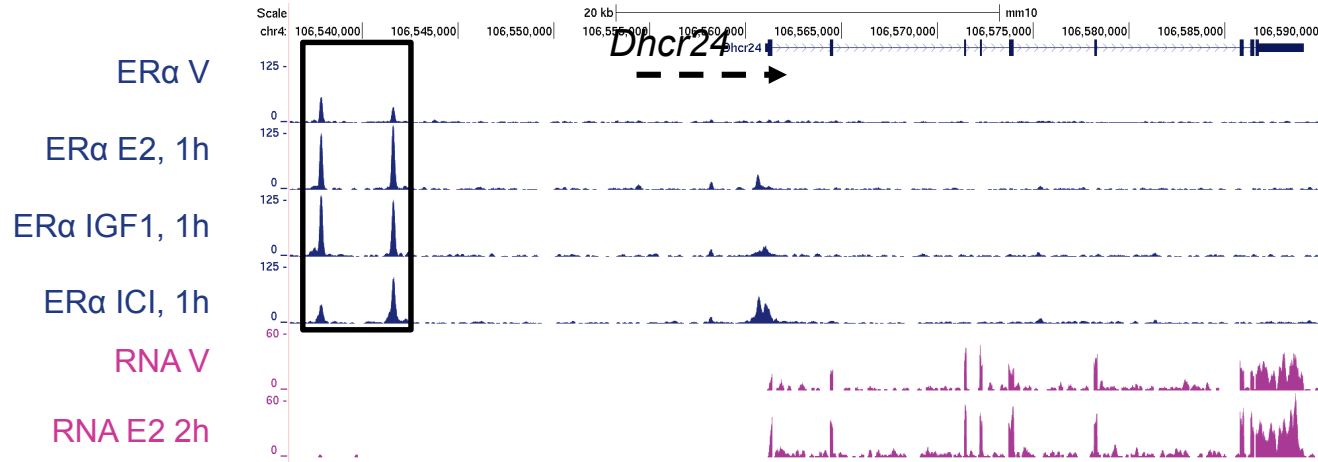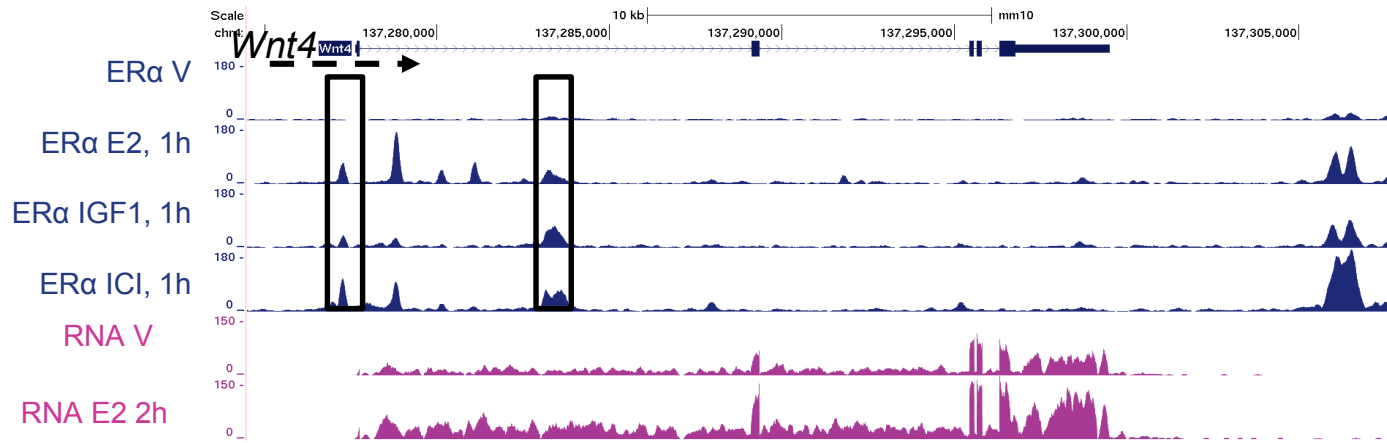

# Supplemental Figure 4A

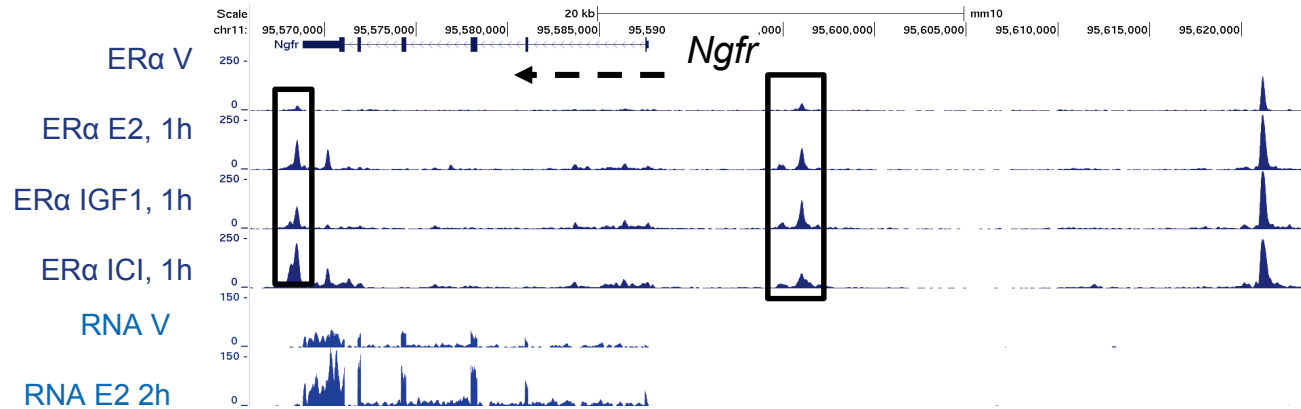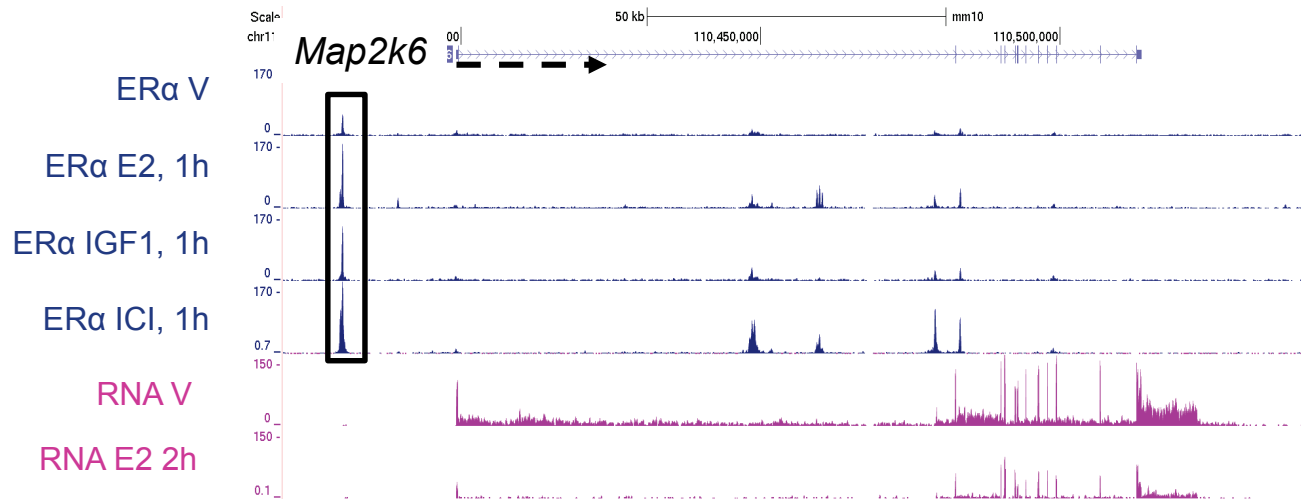

# Supplemental Figure 4B

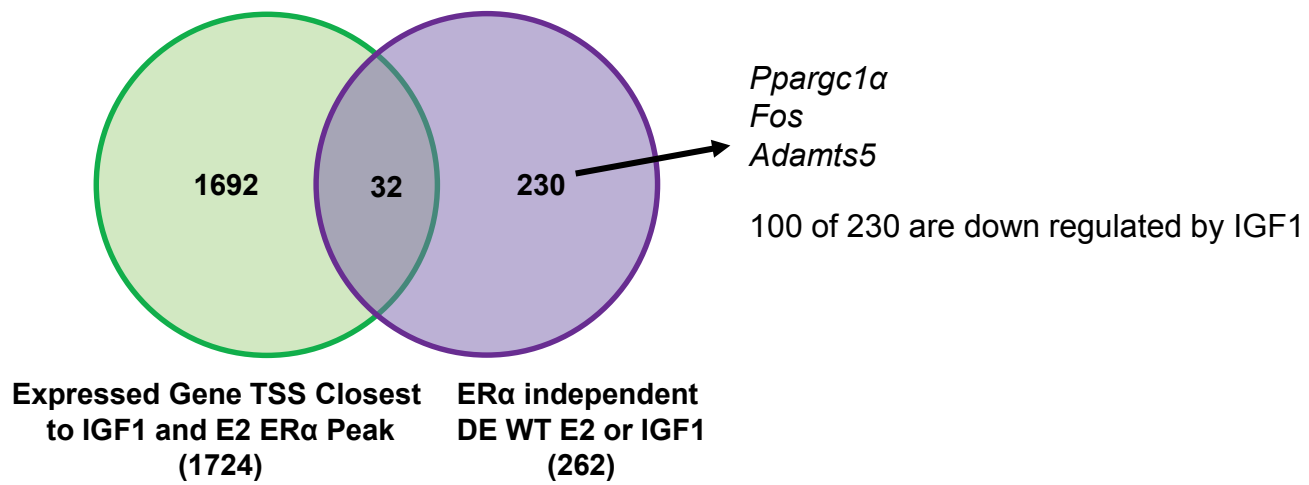

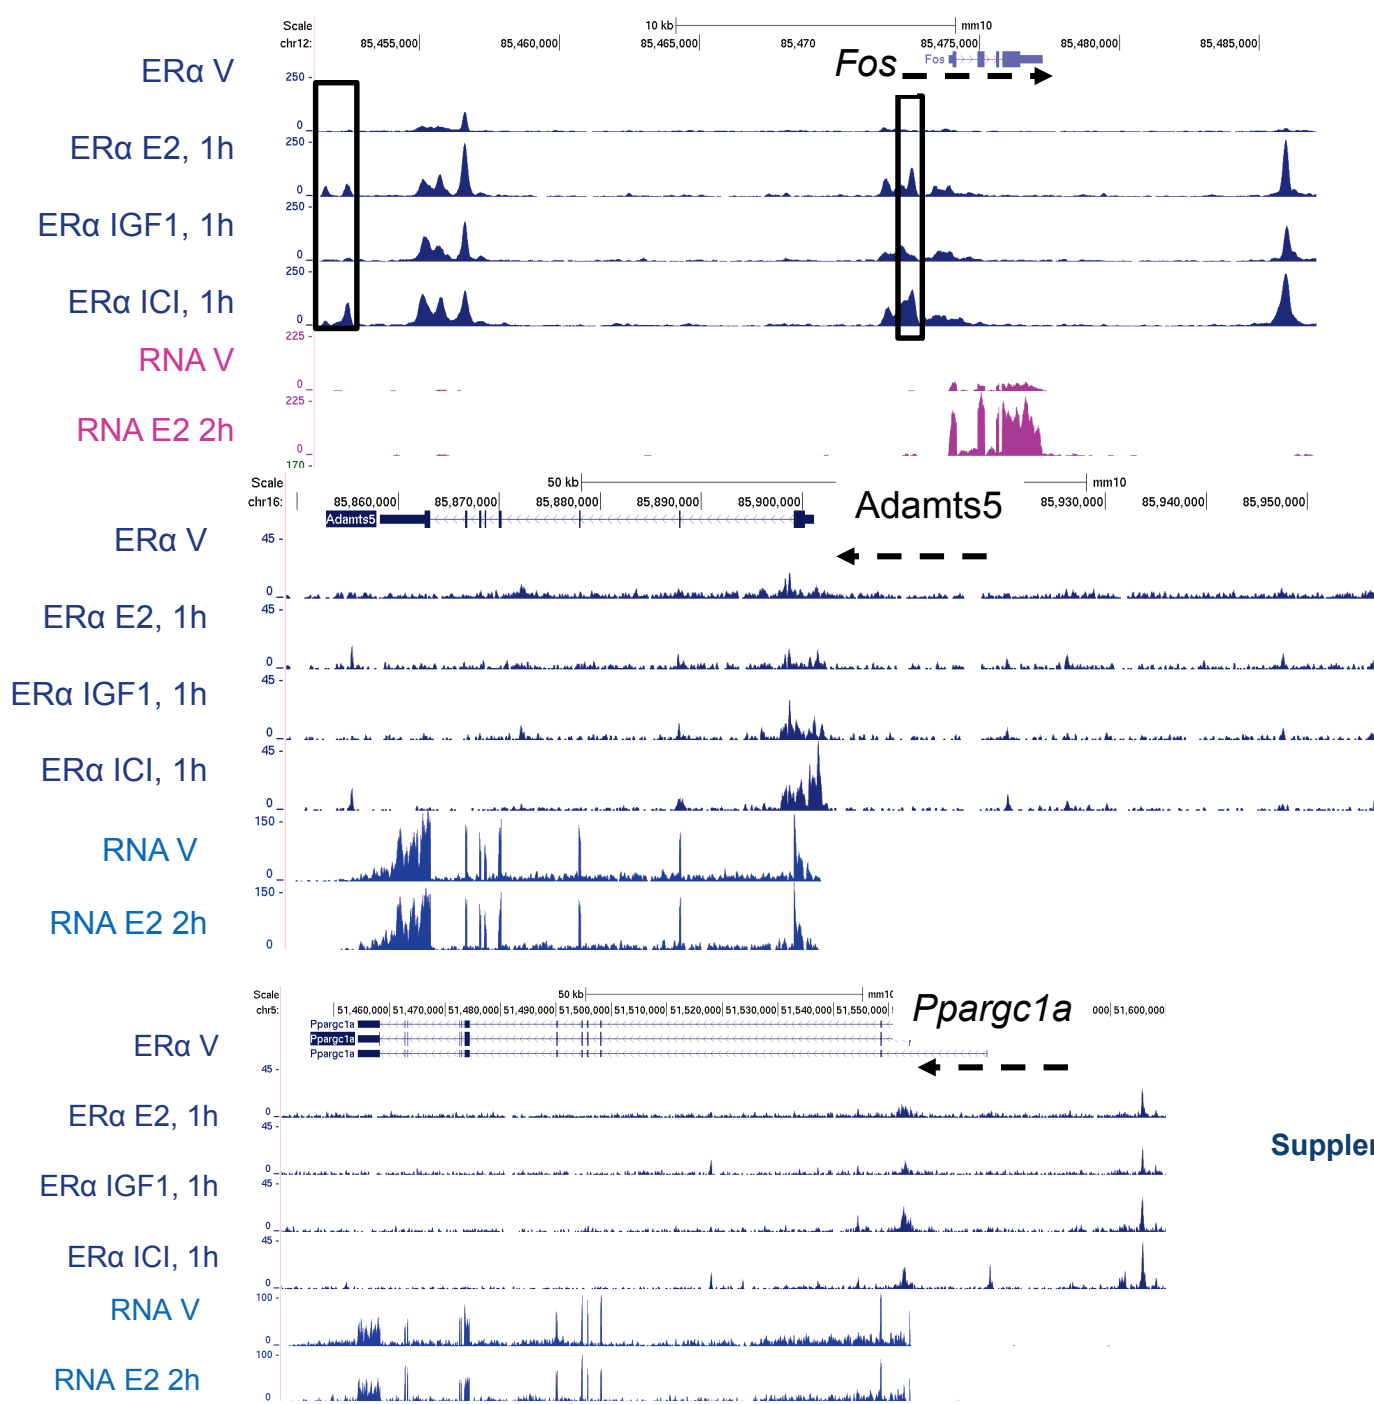

Supplemental Figure 4C
